# Supplementary material for: Hyper-Activation of mPFC Underlies Specific Traumatic Stress-Induced Sleep–Wake EEG Disturbances
Source: Front Neurosci. 2020 Aug 18;14:883. doi: 10.3389/fnins.2020.00883 (PMC7461881; doi:10.3389/fnins.2020.00883)
Supplement: TABLE S1 — Statistical analysis. The complete sample size, statistical test method, and precise value results for each comparison were reported. [file Table_1.XLSX]

## Sheet: Figure 2-6
Figure	Comparison	Sample size	Statistical test	Post-hoc	Treatment effect	P value	Phase effect	P-value	Interaction	P-value	ZT/Hz P-value summary
Figure 2
A	SD4-BL vs. SPS-BL, NREMS	n=20/group	Two-way RM ANOVA	Sidak's test	F (1, 456) = 0.05050	P = 0.8223	F (23, 456) = 39.39	P < 0.0001	F (23, 456) = 1.148	P = 0.2887	ZT	ZT0	ZT1	ZT2	ZT3	ZT4	ZT5	ZT6	ZT7	ZT8	ZT9	ZT10	ZT11	ZT12	ZT13	ZT14	ZT15	ZT16	ZT17	ZT18	ZT19	ZT20	ZT21	ZT22	ZT23
												0.4712	> 0.9999	> 0.9999	> 0.9999	> 0.9999	0.9915	> 0.9999	> 0.9999	> 0.9999	0.9999	> 0.9999	> 0.9999	0.9999	> 0.9999	> 0.9999	0.408	> 0.9999	0.5736	0.982	> 0.9999	> 0.9999	> 0.9999	> 0.9999	0.9932
	SD4-D1 vs. SPS-D1, NREMS	n=20/group	Two-way RM ANOVA	Sidak's test	F (1, 380) = 13.60	P = 0.0003	F (19, 380) = 21.23	P < 0.0001	F (19, 380) = 6.636	P < 0.0001	ZT	ZT0	ZT1	ZT2	ZT3	ZT4	ZT5	ZT6	ZT7	ZT8	ZT9	ZT10	ZT11	ZT12	ZT13	ZT14	ZT15	ZT16	ZT17	ZT18	ZT19	ZT20	ZT21	ZT22	ZT23
																0.0006	> 0.9999	0.718	> 0.9999	> 0.9999	0.9928	0.9896	> 0.9999	0.7275	> 0.9999	> 0.9999	0.807	0.9725	< 0.0001	0.7036	0.0032	0.986	< 0.0001	< 0.0001	0.7461
	SD4-BL vs. SPS-BL, REMS	n=20/group	Two-way RM ANOVA	Sidak's test	F (1, 456) = 0.05556	P = 0.8138	F (23, 456) = 56.56	P < 0.0001	F (23, 456) = 0.7026	P = 0.8446	ZT	ZT0	ZT1	ZT2	ZT3	ZT4	ZT5	ZT6	ZT7	ZT8	ZT9	ZT10	ZT11	ZT12	ZT13	ZT14	ZT15	ZT16	ZT17	ZT18	ZT19	ZT20	ZT21	ZT22	ZT23
												> 0.9999	> 0.9999	0.986	> 0.9999	> 0.9999	> 0.9999	> 0.9999	> 0.9999	0.9969	> 0.9999	0.986	> 0.9999	> 0.9999	> 0.9999	> 0.9999	> 0.9999	0.9993	> 0.9999	0.6459	> 0.9999	> 0.9999	> 0.9999	> 0.9999	> 0.9999
	SD4-D1 vs. SPS-D1, REMS	n=20/group	Two-way RM ANOVA	Sidak's test	F (1, 380) = 10.72	P = 0.0012	F (19, 380) = 25.79	P < 0.0001	F (19, 380) = 8.338	P < 0.0001	ZT	ZT0	ZT1	ZT2	ZT3	ZT4	ZT5	ZT6	ZT7	ZT8	ZT9	ZT10	ZT11	ZT12	ZT13	ZT14	ZT15	ZT16	ZT17	ZT18	ZT19	ZT20	ZT21	ZT22	ZT23
																0.0025	< 0.0001	0.0005	> 0.9999	0.6445	> 0.9999	> 0.9999	> 0.9999	> 0.9999	> 0.9999	> 0.9999	0.9998	0.5005	0.0004	0.0065	0.0119	0.0434	< 0.0001	0.0012	0.9932
	SD4-BL vs. SPS-BL, Wake	n=20/group	Two-way RM ANOVA	Sidak's test	F (1, 456) = 0.04420	P = 0.8336	F (23, 456) = 48.86	P < 0.0001	F (23, 456) = 1.128	P = 0.3096	ZT	ZT0	ZT1	ZT2	ZT3	ZT4	ZT5	ZT6	ZT7	ZT8	ZT9	ZT10	ZT11	ZT12	ZT13	ZT14	ZT15	ZT16	ZT17	ZT18	ZT19	ZT20	ZT21	ZT22	ZT23
												0.6101	> 0.9999	> 0.9999	> 0.9999	> 0.9999	0.9918	> 0.9999	> 0.9999	> 0.9999	> 0.9999	> 0.9999	> 0.9999	0.9994	> 0.9999	> 0.9999	0.4033	0.9994	0.6894	0.8959	> 0.9999	> 0.9999	> 0.9999	> 0.9999	0.9969
	SD4-D1 vs. SPS-D1, Wake	n=20/group	Two-way RM ANOVA	Sidak's test	F (1, 380) = 11.04	P = 0.0010	F (19, 380) = 23.80	P < 0.0001	F (19, 380) = 7.525	P < 0.0001	ZT	ZT0	ZT1	ZT2	ZT3	ZT4	ZT5	ZT6	ZT7	ZT8	ZT9	ZT10	ZT11	ZT12	ZT13	ZT14	ZT15	ZT16	ZT17	ZT18	ZT19	ZT20	ZT21	ZT22	ZT23
																< 0.0001	0.8671	0.2217	> 0.9999	> 0.9999	0.9968	0.9966	> 0.9999	0.9104	> 0.9999	> 0.9999	0.7951	0.8789	< 0.0001	0.5369	0.0033	0.8449	< 0.0001	< 0.0001	0.9944
B	SD4-D1 vs. SPS-D1, NREMS	n=20/group
	ZT4-23		Paired t-test,Two-tailed			0.0494
	Light		Paired t-test,Two-tailed			0.0247
	Dark		Paired t-test,Two-tailed			0.0003
	SD4-D1 vs. SPS-D1, REMS	n=20/group
	ZT4-23		Paired t-test,Two-tailed			0.0107
	Light		Paired t-test,Two-tailed			0.0003
	Dark		Paired t-test,Two-tailed			< 0.0001
	SD4-D1 vs. SPS-D1, Wake	n=20/group
	ZT4-23		Paired t-test,Two-tailed			0.0516
	Light		Paired t-test,Two-tailed			0.0025
	Dark		Paired t-test,Two-tailed			0.0001
Figure 3
A	SD4-D1 vs. SPS-D1, NREMS Delta	n=20/group	Two-way ANOVA	Sidak's test	F (1, 732) = 114.8	P < 0.0001	F (19, 732) = 36.20	P < 0.0001	F (19, 732) = 4.173	P < 0.0001	ZT	ZT0	ZT1	ZT2	ZT3	ZT4	ZT5	ZT6	ZT7	ZT8	ZT9	ZT10	ZT11	ZT12	ZT13	ZT14	ZT15	ZT16	ZT17	ZT18	ZT19	ZT20	ZT21	ZT22	ZT23
																< 0.0001	0.0014	0.2467	> 0.9999	0.9179	0.9897	> 0.9999	0.9987	0.7603	0.5015	> 0.9999	0.5536	0.8864	0.0043	0.6377	0.1281	0.0928	0.6735	0.0359	0.5812
	SD4-D1 vs. SPS-D1, NREMS Delta	n=20/group
	Light		Paired t-test,Two-tailed			0.0016
	Dark		Paired t-test,Two-tailed			0.0001
B	SD4-D1 vs. SPS-D1, NREMS Theta	n=20/group	Two-way ANOVA	Sidak's test	F (1, 732) = 145.1	P < 0.0001	F (19, 732) = 8.622	P < 0.0001	F (19, 732) = 5.037	P < 0.0001	ZT	ZT0	ZT1	ZT2	ZT3	ZT4	ZT5	ZT6	ZT7	ZT8	ZT9	ZT10	ZT11	ZT12	ZT13	ZT14	ZT15	ZT16	ZT17	ZT18	ZT19	ZT20	ZT21	ZT22	ZT23
																< 0.0001	0.9998	> 0.9999	0.9755	> 0.9999	> 0.9999	> 0.9999	0.6121	0.0069	0.0041	0.1102	0.0005	0.0013	< 0.0001	0.0434	< 0.0001	0.0131	< 0.0001	< 0.0001	0.9136
	SD4-D1 vs. SPS-D1, NREMS Theta	n=20/group
	Light		Paired t-test,Two-tailed			0.2628
	Dark		Paired t-test,Two-tailed			< 0.0001
C	SD4-D1 vs. SPS-D1, NREMS Alpha	n=20/group	Two-way ANOVA	Sidak's test	F (1, 732) = 46.48	P < 0.0001	F (19, 732) = 4.636	P < 0.0001	F (19, 732) = 3.841	P < 0.0001	ZT	ZT0	ZT1	ZT2	ZT3	ZT4	ZT5	ZT6	ZT7	ZT8	ZT9	ZT10	ZT11	ZT12	ZT13	ZT14	ZT15	ZT16	ZT17	ZT18	ZT19	ZT20	ZT21	ZT22	ZT23
																< 0.0001	0.7442	> 0.9999	0.7737	0.9929	0.9994	0.9998	> 0.9999	0.9362	0.2026	0.1544	0.3377	0.414	0.0229	0.6838	0.4639	0.374	0.9458	0.0014	> 0.9999
	SD4-D1 vs. SPS-D1, NREMS Alpha	n=20/group
	Light		Paired t-test,Two-tailed			0.5756
	Dark		Paired t-test,Two-tailed			0.0005
D	SD4-D1 vs. SPS-D1, NREMS Beta	n=20/group	Two-way ANOVA	Sidak's test	F (1, 732) = 71.13	P < 0.0001	F (19, 732) = 7.795	P < 0.0001	F (19, 732) = 4.996	P < 0.0001	ZT	ZT0	ZT1	ZT2	ZT3	ZT4	ZT5	ZT6	ZT7	ZT8	ZT9	ZT10	ZT11	ZT12	ZT13	ZT14	ZT15	ZT16	ZT17	ZT18	ZT19	ZT20	ZT21	ZT22	ZT23
																< 0.0001	0.9977	0.9926	0.7345	0.9928	0.9814	> 0.9999	> 0.9999	0.0216	0.0209	0.0455	0.0056	0.0112	0.0004	0.4121	0.0311	0.1391	0.1638	0.0006	> 0.9999
	SD4-D1 vs. SPS-D1, NREMS Beta	n=20/group
	Light		Paired t-test,Two-tailed			0.8869
	Dark		Paired t-test,Two-tailed			< 0.0001
E	SD4-D1 vs. SPS-D1, REMS Delta	n=20/group	Two-way ANOVA	Sidak's test	F (1, 643) = 2.721	P = 0.0995	F (19, 643) = 1.760	P = 0.0239	F (19, 643) = 1.434	P = 0.1039	ZT	ZT0	ZT1	ZT2	ZT3	ZT4	ZT5	ZT6	ZT7	ZT8	ZT9	ZT10	ZT11	ZT12	ZT13	ZT14	ZT15	ZT16	ZT17	ZT18	ZT19	ZT20	ZT21	ZT22	ZT23
																0.9763	0.4297	0.3534	0.8799	> 0.9999	0.9685	> 0.9999	0.9997	0.9895	0.9667	0.9966	0.9983	0.9094	> 0.9999	> 0.9999	> 0.9999	> 0.9999	> 0.9999	> 0.9999	> 0.9999
	SD4-D1 vs. SPS-D1, REMS Delta	n=20/group
	Light		Paired t-test,Two-tailed			0.007
	Dark		Paired t-test,Two-tailed			0.287
F	SD4-D1 vs. SPS-D1, REMS Theta	n=20/group	Two-way ANOVA	Sidak's test	F (1, 643) = 10.55	P = 0.0012	F (19, 643) = 1.247	P = 0.2128	F (19, 643) = 1.878	P = 0.0132	ZT	ZT0	ZT1	ZT2	ZT3	ZT4	ZT5	ZT6	ZT7	ZT8	ZT9	ZT10	ZT11	ZT12	ZT13	ZT14	ZT15	ZT16	ZT17	ZT18	ZT19	ZT20	ZT21	ZT22	ZT23
																> 0.9999	0.648	0.8429	> 0.9999	> 0.9999	> 0.9999	> 0.9999	> 0.9999	0.2241	> 0.9999	> 0.9999	0.3556	0.3562	0.695	0.1831	0.9988	0.5409	0.9941	0.9967	> 0.9999
	SD4-D1 vs. SPS-D1, REMS Theta	n=20/group
	Light		Paired t-test,Two-tailed			0.3678
	Dark		Paired t-test,Two-tailed			0.0008
G	SD4-D1 vs. SPS-D1, REMS Alpha	n=20/group	Two-way ANOVA	Sidak's test	F (1, 643) = 25.54	P < 0.0001	F (19, 643) = 2.804	P < 0.0001	F (19, 643) = 6.045	P < 0.0001	ZT	ZT0	ZT1	ZT2	ZT3	ZT4	ZT5	ZT6	ZT7	ZT8	ZT9	ZT10	ZT11	ZT12	ZT13	ZT14	ZT15	ZT16	ZT17	ZT18	ZT19	ZT20	ZT21	ZT22	ZT23
																0.4684	< 0.0001	< 0.0001	< 0.0001	0.0011	0.0043	0.024	0.4232	0.9983	> 0.9999	0.9966	> 0.9999	0.9338	> 0.9999	0.9986	> 0.9999	0.3895	0.9683	0.9999	0.8465
	SD4-D1 vs. SPS-D1, REMS Alpha	n=20/group
	Light		Paired t-test,Two-tailed			< 0.0001
	Dark		Paired t-test,Two-tailed			0.0546
H	SD4-D1 vs. SPS-D1, REMS Beta	n=20/group	Two-way ANOVA	Sidak's test	F (1, 643) = 8.508	P = 0.0037	F (19, 643) = 2.346	P = 0.0011	F (19, 643) = 4.014	P < 0.0001	ZT	ZT0	ZT1	ZT2	ZT3	ZT4	ZT5	ZT6	ZT7	ZT8	ZT9	ZT10	ZT11	ZT12	ZT13	ZT14	ZT15	ZT16	ZT17	ZT18	ZT19	ZT20	ZT21	ZT22	ZT23
																0.7319	0.1028	0.0003	0.0019	0.0628	0.2131	0.3871	> 0.9999	> 0.9999	> 0.9999	> 0.9999	0.9997	0.3743	0.3663	> 0.9999	0.9997	0.9725	0.9742	> 0.9999	0.9397
	SD4-D1 vs. SPS-D1, REMS Beta	n=20/group
	Light		Paired t-test,Two-tailed			< 0.0001
	Dark		Paired t-test,Two-tailed			0.0504
I	SD4-D1 vs. SPS-D1, Wake Delta	n=20/group	Two-way ANOVA	Sidak's test	F (1, 760) = 87.07	P < 0.0001	F (19, 760) = 9.414	P < 0.0001	F (19, 760) = 1.788	P = 0.0204	ZT	ZT0	ZT1	ZT2	ZT3	ZT4	ZT5	ZT6	ZT7	ZT8	ZT9	ZT10	ZT11	ZT12	ZT13	ZT14	ZT15	ZT16	ZT17	ZT18	ZT19	ZT20	ZT21	ZT22	ZT23
																0.0017	< 0.0001	0.0068	0.0279	0.0024	0.24	0.9816	0.1536	0.0783	0.5239	0.7485	0.5507	0.9955	> 0.9999	> 0.9999	> 0.9999	> 0.9999	> 0.9999	> 0.9999	0.4223
	SD4-D1 vs. SPS-D1, Wake Delta	n=20/group
	Light		Paired t-test,Two-tailed			< 0.0001
	Dark		Paired t-test,Two-tailed			0.0068
J	SD4-D1 vs. SPS-D1, Wake Theta	n=20/group	Two-way ANOVA	Sidak's test	F (1, 760) = 33.28	P < 0.0001	F (19, 760) = 2.589	P = 0.0002	F (19, 760) = 0.6423	P = 0.8750	ZT	ZT0	ZT1	ZT2	ZT3	ZT4	ZT5	ZT6	ZT7	ZT8	ZT9	ZT10	ZT11	ZT12	ZT13	ZT14	ZT15	ZT16	ZT17	ZT18	ZT19	ZT20	ZT21	ZT22	ZT23
																> 0.9999	> 0.9999	> 0.9999	0.9909	> 0.9999	0.9983	> 0.9999	0.2361	0.0811	0.288	0.6058	0.9486	0.9765	0.9864	0.9346	0.935	0.9935	0.9418	0.9999	0.903
	SD4-D1 vs. SPS-D1, Wake Theta	n=20/group
	Light		Paired t-test,Two-tailed			0.2863
	Dark		Paired t-test,Two-tailed			0.0331
K	SD4-D1 vs. SPS-D1, Wake Alpha	n=20/group	Two-way ANOVA	Sidak's test	F (1, 760) = 122.1	P < 0.0001	F (19, 760) = 2.799	P < 0.0001	F (19, 760) = 2.292	P = 0.0014	ZT	ZT0	ZT1	ZT2	ZT3	ZT4	ZT5	ZT6	ZT7	ZT8	ZT9	ZT10	ZT11	ZT12	ZT13	ZT14	ZT15	ZT16	ZT17	ZT18	ZT19	ZT20	ZT21	ZT22	ZT23
																0.0003	0.9249	> 0.9999	0.9991	> 0.9999	> 0.9999	> 0.9999	0.1668	0.001	0.0693	0.0248	0.0983	0.0635	< 0.0001	0.1474	0.0218	0.059	0.009	0.0014	0.122
	SD4-D1 vs. SPS-D1, Wake Alpha	n=20/group
	Light		Paired t-test,Two-tailed			0.0802
	Dark		Paired t-test,Two-tailed			< 0.0001
L	SD4-D1 vs. SPS-D1, Wake Beta	n=20/group	Two-way ANOVA	Sidak's test	F (1, 760) = 138.7	P < 0.0001	F (19, 760) = 1.335	P = 0.1533	F (19, 760) = 0.9100	P = 0.5704	ZT	ZT0	ZT1	ZT2	ZT3	ZT4	ZT5	ZT6	ZT7	ZT8	ZT9	ZT10	ZT11	ZT12	ZT13	ZT14	ZT15	ZT16	ZT17	ZT18	ZT19	ZT20	ZT21	ZT22	ZT23
																0.0821	0.3148	0.999	0.5586	0.8025	0.9913	> 0.9999	0.0798	0.0013	0.0009	0.005	0.0183	0.0994	0.0023	0.0461	0.3204	0.1125	0.0552	0.1498	0.4946
	SD4-D1 vs. SPS-D1, Wake Beta	n=20/group
	Light		Paired t-test,Two-tailed			0.0008
	Dark		Paired t-test,Two-tailed			< 0.0001
Figure 4
B	SD4-D7 vs. SPS-D7, NREMS Delta	n=19/group
	Light		Paired t-test,Two-tailed			0.2025
	Dark		Paired t-test,Two-tailed			0.1657
	SD4-D7 vs. SPS-D7, NREMS Theta	n=19/group
	Light		Paired t-test,Two-tailed			0.0574
	Dark		Paired t-test,Two-tailed			0.0307
	SD4-D7 vs. SPS-D7, NREMS Alpha	n=19/group
	Light		Paired t-test,Two-tailed			0.002
	Dark		Paired t-test,Two-tailed			0.0023
	SD4-D7 vs. SPS-D7, NREMS Beta	n=19/group
	Light		Paired t-test,Two-tailed			0.0018
	Dark		Paired t-test,Two-tailed			0.0039
C	SD4-D7 vs. SPS-D7, REMS Delta	n=19/group
	Light		Paired t-test,Two-tailed			0.0687
	Dark		Paired t-test,Two-tailed			0.1292
	SD4-D7 vs. SPS-D7, REMS Theta	n=19/group
	Light		Paired t-test,Two-tailed			0.0379
	Dark		Paired t-test,Two-tailed			0.0234
	SD4-D7 vs. SPS-D7, REMS Alpha	n=19/group
	Light		Paired t-test,Two-tailed			0.0311
	Dark		Paired t-test,Two-tailed			0.1816
	SD4-D7 vs. SPS-D7, REMS Beta	n=19/group
	Light		Paired t-test,Two-tailed			0.1252
	Dark		Paired t-test,Two-tailed			0.8289
D	SD4-D7 vs. SPS-D7, Wake Delta	n=19/group
	Light		Paired t-test,Two-tailed			> 0.9999
	Dark		Paired t-test,Two-tailed			0.7205
	SD4-D7 vs. SPS-D7, Wake Theta	n=19/group
	Light		Paired t-test,Two-tailed			0.1814
	Dark		Paired t-test,Two-tailed			0.2755
	SD4-D7 vs. SPS-D7, Wake Alpha	n=19/group
	Light		Paired t-test,Two-tailed			0.041
	Dark		Paired t-test,Two-tailed			0.0354
	SD4-D7 vs. SPS-D7, Wake Beta	n=19/group
	Light		Paired t-test,Two-tailed			0.0451
	Dark		Paired t-test,Two-tailed			0.1102
Figure 5
D	SD4 vs. SPS	n=5/group
	M1 ZT4.5		Unpaired t-test,Two-tailed			0.0048
	M1 ZT7.5		Unpaired t-test,Two-tailed			0.2125
	M2 ZT4.5		Unpaired t-test,Two-tailed			0.0022
	M2 ZT7.5		Unpaired t-test,Two-tailed			0.1451
	Cg1 ZT4.5		Unpaired t-test,Two-tailed			0.0014
	Cg1 ZT7.5		Unpaired t-test,Two-tailed			0.0251
	Prl ZT4.5		Unpaired t-test,Two-tailed			0.0041
	Prl ZT7.5		Unpaired t-test,Two-tailed			0.0004
	IL ZT4.5		Unpaired t-test,Two-tailed			0.0005
	IL ZT7.5		Unpaired t-test,Two-tailed			0.0002
	DP ZT4.5		Unpaired t-test,Two-tailed			<0.0001
	DP ZT7.5		Unpaired t-test,Two-tailed			0.001
	MO ZT4.5		Unpaired t-test,Two-tailed			0.0004
	MO ZT7.5		Unpaired t-test,Two-tailed			0.1023
	VO ZT4.5		Unpaired t-test,Two-tailed			0.0009
	VO ZT7.5		Unpaired t-test,Two-tailed			0.2621
	LO ZT4.5		Unpaired t-test,Two-tailed			0.0023
	LO ZT7.5		Unpaired t-test,Two-tailed			0.0268
Figure 6
C	mCherry,SD4-D1 vs. SPS-D1, NREMS Delta	n=9/group	Two-way ANOVA	Sidak's test	F (1, 311) = 127.3	P < 0.0001	F (19, 311) = 7.028	P < 0.0001	F (19, 311) = 2.881	P < 0.0001	ZT	ZT0	ZT1	ZT2	ZT3	ZT4	ZT5	ZT6	ZT7	ZT8	ZT9	ZT10	ZT11	ZT12	ZT13	ZT14	ZT15	ZT16	ZT17	ZT18	ZT19	ZT20	ZT21	ZT22	ZT23
																< 0.0001	0.9991	> 0.9999	0.9946	> 0.9999	0.9822	> 0.9999	> 0.9999	0.0418	0.8753	0.0034	0.1429	0.0107	0.0027	< 0.0001	0.0878	0.3868	0.0153	0.0045	0.3823
	hM4Di,SD4-D1 vs. SPS-D1, NREMS Delta	n=9/group	Two-way ANOVA	Sidak's test	F (1, 300) = 3.424	P = 0.0652	F (19, 300) = 9.997	P < 0.0001	F (19, 300) = 1.137	P = 0.3130	ZT	ZT0	ZT1	ZT2	ZT3	ZT4	ZT5	ZT6	ZT7	ZT8	ZT9	ZT10	ZT11	ZT12	ZT13	ZT14	ZT15	ZT16	ZT17	ZT18	ZT19	ZT20	ZT21	ZT22	ZT23
																0.8459	0.999	> 0.9999	> 0.9999	> 0.9999	0.9995	> 0.9999	0.9997	> 0.9999	0.9836	> 0.9999	> 0.9999	> 0.9999	0.5286	0.9936	> 0.9999	0.7544	0.9522	0.5172	> 0.9999
D	mCherry vs. hM4Di, (‘SPS-D1’-‘SD4-D1’)/ ‘SD4-D1’ power change (%)	n=9/group
	NREMS Delta ZT4		Unpaired t-test,Two-tailed			0.0068
	NREMS Theta ZT4		Unpaired t-test,Two-tailed			0.3747
	NREMS Alpha ZT4		Unpaired t-test,Two-tailed			0.3459
	NREMS Beta ZT4		Unpaired t-test,Two-tailed			0.2738
E	mCherry vs. hM4Di, (‘SPS-D1’-‘SD4-D1’)/ ‘SD4-D1’ power change (%)	n=9/group
	NREMS Delta
	Light		Unpaired t-test,Two-tailed			0.0396
	Dark		Unpaired t-test,Two-tailed			0.0316
	NREMS Theta
	Light		Unpaired t-test,Two-tailed			0.7937
	Dark		Unpaired t-test,Two-tailed			0.1248
	NREMS Alpha
	Light		Unpaired t-test,Two-tailed			0.9036
	Dark		Unpaired t-test,Two-tailed			0.7867
	NREMS Beta
	Light		Unpaired t-test,Two-tailed			0.9662
	Dark		Unpaired t-test,Two-tailed			0.8771
F	mCherry vs. hM4Di, (‘SPS-D7’-‘SD4-D7’)/ ‘SD4-D7’ power change (%)	n=9/group
	NREMS Delta
	Light		Unpaired t-test,Two-tailed			0.0243
	Dark		Unpaired t-test,Two-tailed			0.0104
	NREMS Theta
	Light		Unpaired t-test,Two-tailed			0.0154
	Dark		Unpaired t-test,Two-tailed			0.0506
	NREMS Alpha
	Light		Unpaired t-test,Two-tailed			0.0077
	Dark		Unpaired t-test,Two-tailed			0.0129
	NREMS Beta
	Light		Unpaired t-test,Two-tailed			0.0018
	Dark		Unpaired t-test,Two-tailed			0.0109

## Sheet: Supplementary Figure 1-7
Figure	Comparison	Sample size	Statistical test	Post-hoc	Treatment effect	P value	Phase effect	P-value	Interaction	P-value	ZT/Hz P-value summary
Supplementary Figure1
A	SD4-BL vs. SPS-BL, NREMS	n=20/group
	ZT0-23		Paired t-test,Two-tailed			0.624
	Light		Paired t-test,Two-tailed			0.3723
	Dark		Paired t-test,Two-tailed			0.8757
	SD4-BL vs. SPS-BL, REMS	n=20/group
	ZT0-23		Paired t-test,Two-tailed			0.8806
	Light		Paired t-test,Two-tailed			0.1253
	Dark		Paired t-test,Two-tailed			0.3428
	SD4-BL vs. SPS-BL, Wake	n=20/group
	ZT0-23		Paired t-test,Two-tailed			0.9633
	Light		Paired t-test,Two-tailed			0.1085
	Dark		Paired t-test,Two-tailed			0.3552
B	SD4-BL vs. SD4-D1, NREMS	n=20/group
	ZT4-23		Paired t-test,Two-tailed			0.2874
	Light		Paired t-test,Two-tailed			0.3666
	Dark		Paired t-test,Two-tailed			0.0262
	ZT4		Paired t-test,Two-tailed			0.1235
	SD4-BL vs. SD4-D1, REMS	n=20/group
	ZT4-23		Paired t-test,Two-tailed			< 0.0001
	Light		Paired t-test,Two-tailed			0.2272
	Dark		Paired t-test,Two-tailed			< 0.0001
	ZT4		Paired t-test,Two-tailed			< 0.0001
	SD4-BL vs. SD4-D1, Wake	n=20/group
	ZT4-23		Paired t-test,Two-tailed			0.0039
	Light		Paired t-test,Two-tailed			0.6045
	Dark		Paired t-test,Two-tailed			0.001
	ZT4		Paired t-test,Two-tailed			0.0229
C	SPS-BL vs. SPS-D1, NREMS	n=20/group
	ZT4-23		Paired t-test,Two-tailed			0.0012
	Light		Paired t-test,Two-tailed			0.0008
	Dark		Paired t-test,Two-tailed			< 0.0001
	ZT4		Paired t-test,Two-tailed			< 0.0001
	SPS-BL vs. SPS-D1, REMS	n=20/group
	ZT4-23		Paired t-test,Two-tailed			< 0.0001
	Light		Paired t-test,Two-tailed			0.0048
	Dark		Paired t-test,Two-tailed			< 0.0001
	ZT4		Paired t-test,Two-tailed			< 0.0001
	SPS-BL vs. SPS-D1, Wake	n=20/group
	ZT4-23		Paired t-test,Two-tailed			0.0002
	Light		Paired t-test,Two-tailed			0.0005
	Dark		Paired t-test,Two-tailed			< 0.0001
	ZT4		Paired t-test,Two-tailed			< 0.0001
Supplementary Figure 2
A	SD4-BL vs. SPS-BL, NREMS Delta	n=20/group	Two-way ANOVA	Sidak's test	F (1, 873) = 0.1456	P = 0.7029	F (23, 873) = 17.34	P < 0.0001	F (23, 873) = 0.8550	P = 0.6612	ZT	ZT0	ZT1	ZT2	ZT3	ZT4	ZT5	ZT6	ZT7	ZT8	ZT9	ZT10	ZT11	ZT12	ZT13	ZT14	ZT15	ZT16	ZT17	ZT18	ZT19	ZT20	ZT21	ZT22	ZT23
												> 0.9999	> 0.9999	> 0.9999	> 0.9999	> 0.9999	> 0.9999	> 0.9999	> 0.9999	> 0.9999	> 0.9999	> 0.9999	> 0.9999	> 0.9999	> 0.9999	> 0.9999	0.9718	0.256	0.9086	0.9988	0.9984	0.8194	> 0.9999	> 0.9999	> 0.9999
	SD4-BL vs. SPS-BL, NREMS Delta	n=20/group
	Light		Paired t-test,Two-tailed			0.8883
	Dark		Paired t-test,Two-tailed			0.3735
B	SD4-BL vs. SPS-BL, NREMS Theta	n=20/group	Two-way ANOVA	Sidak's test	F (1, 873) = 9.082	P = 0.0027	F (23, 873) = 18.04	P < 0.0001	F (23, 873) = 0.6770	P = 0.8711	ZT	ZT0	ZT1	ZT2	ZT3	ZT4	ZT5	ZT6	ZT7	ZT8	ZT9	ZT10	ZT11	ZT12	ZT13	ZT14	ZT15	ZT16	ZT17	ZT18	ZT19	ZT20	ZT21	ZT22	ZT23
												> 0.9999	> 0.9999	> 0.9999	> 0.9999	> 0.9999	> 0.9999	> 0.9999	> 0.9999	> 0.9999	> 0.9999	> 0.9999	> 0.9999	0.9255	0.999	0.9953	0.9931	> 0.9999	0.9999	0.6609	0.9481	0.5894	> 0.9999	0.9993	> 0.9999
	SD4-BL vs. SPS-BL, NREMS Theta	n=20/group
	Light		Paired t-test,Two-tailed			0.7434
	Dark		Paired t-test,Two-tailed			0.0303
C	SD4-BL vs. SPS-BL, NREMS Alpha	n=20/group	Two-way ANOVA	Sidak's test	F (1, 873) = 10.34	P = 0.0014	F (23, 873) = 7.599	P < 0.0001	F (23, 873) = 0.5440	P = 0.9607	ZT	ZT0	ZT1	ZT2	ZT3	ZT4	ZT5	ZT6	ZT7	ZT8	ZT9	ZT10	ZT11	ZT12	ZT13	ZT14	ZT15	ZT16	ZT17	ZT18	ZT19	ZT20	ZT21	ZT22	ZT23
												> 0.9999	> 0.9999	> 0.9999	0.9998	> 0.9999	> 0.9999	> 0.9999	> 0.9999	> 0.9999	> 0.9999	> 0.9999	> 0.9999	> 0.9999	0.8562	0.9907	0.6006	> 0.9999	> 0.9999	0.9957	0.9959	0.4332	> 0.9999	> 0.9999	> 0.9999
	SD4-BL vs. SPS-BL, NREMS Alpha	n=20/group
	Light		Paired t-test,Two-tailed			0.5833
	Dark		Paired t-test,Two-tailed			0.0072
D	SD4-BL vs. SPS-BL, NREMS Beta	n=20/group	Two-way ANOVA	Sidak's test	F (1, 873) = 1.598	P = 0.2065	F (23, 873) = 17.97	P < 0.0001	F (23, 873) = 0.8351	P = 0.6880	ZT	ZT0	ZT1	ZT2	ZT3	ZT4	ZT5	ZT6	ZT7	ZT8	ZT9	ZT10	ZT11	ZT12	ZT13	ZT14	ZT15	ZT16	ZT17	ZT18	ZT19	ZT20	ZT21	ZT22	ZT23
												> 0.9999	0.9902	> 0.9999	> 0.9999	> 0.9999	> 0.9999	> 0.9999	> 0.9999	> 0.9999	> 0.9999	> 0.9999	> 0.9999	> 0.9999	0.9651	0.9993	0.3838	> 0.9999	> 0.9999	> 0.9999	0.9281	0.918	> 0.9999	> 0.9999	> 0.9999
	SD4-BL vs. SPS-BL, NREMS Beta	n=20/group
	Light		Paired t-test,Two-tailed			0.7558
	Dark		Paired t-test,Two-tailed			0.0098
E	SD4-BL vs. SPS-BL, REMS Delta		Two-way ANOVA	Sidak's test	F (1, 732) = 2.448	P = 0.1181	F (23, 732) = 3.029	P < 0.0001	F (23, 732) = 0.7770	P = 0.7624	ZT	ZT0	ZT1	ZT2	ZT3	ZT4	ZT5	ZT6	ZT7	ZT8	ZT9	ZT10	ZT11	ZT12	ZT13	ZT14	ZT15	ZT16	ZT17	ZT18	ZT19	ZT20	ZT21	ZT22	ZT23
												0.9995	> 0.9999	> 0.9999	> 0.9999	> 0.9999	> 0.9999	> 0.9999	> 0.9999	0.9994	> 0.9999	0.9962	> 0.9999	> 0.9999	0.7801	> 0.9999	> 0.9999	0.9933	> 0.9999	0.8913	> 0.9999	> 0.9999	> 0.9999	> 0.9999	0.9745
	SD4-BL vs. SPS-BL, REMS Delta	n=20/group
	Light		Paired t-test,Two-tailed			0.1069
	Dark		Paired t-test,Two-tailed			0.8624
F	SD4-BL vs. SPS-BL, REMS Theta		Two-way ANOVA	Sidak's test	F (1, 732) = 0.06207	P = 0.8033	F (23, 732) = 1.590	P = 0.0395	F (23, 732) = 0.6125	P = 0.9224	ZT	ZT0	ZT1	ZT2	ZT3	ZT4	ZT5	ZT6	ZT7	ZT8	ZT9	ZT10	ZT11	ZT12	ZT13	ZT14	ZT15	ZT16	ZT17	ZT18	ZT19	ZT20	ZT21	ZT22	ZT23
												> 0.9999	> 0.9999	> 0.9999	> 0.9999	> 0.9999	> 0.9999	> 0.9999	> 0.9999	> 0.9999	> 0.9999	0.9997	> 0.9999	> 0.9999	> 0.9999	> 0.9999	> 0.9999	0.9999	0.9987	0.3538	> 0.9999	> 0.9999	> 0.9999	> 0.9999	> 0.9999
	SD4-BL vs. SPS-BL, REMS Theta	n=20/group
	Light		Paired t-test,Two-tailed			0.3414
	Dark		Paired t-test,Two-tailed			0.5387
G	SD4-BL vs. SPS-BL, REMS Alpha		Two-way ANOVA	Sidak's test	F (1, 732) = 0.4637	P = 0.4961	F (23, 732) = 9.457	P < 0.0001	F (23, 732) = 0.9913	P = 0.4741	ZT	ZT0	ZT1	ZT2	ZT3	ZT4	ZT5	ZT6	ZT7	ZT8	ZT9	ZT10	ZT11	ZT12	ZT13	ZT14	ZT15	ZT16	ZT17	ZT18	ZT19	ZT20	ZT21	ZT22	ZT23
												0.9674	> 0.9999	> 0.9999	0.9998	> 0.9999	> 0.9999	> 0.9999	> 0.9999	> 0.9999	> 0.9999	> 0.9999	0.9796	0.9999	> 0.9999	0.8912	> 0.9999	> 0.9999	> 0.9999	> 0.9999	0.9854	0.0986	> 0.9999	0.9868	> 0.9999
	SD4-BL vs. SPS-BL, REMS Alpha	n=20/group
	Light		Paired t-test,Two-tailed			0.0307
	Dark		Paired t-test,Two-tailed			0.8861
H	SD4-BL vs. SPS-BL, REMS Beta		Two-way ANOVA	Sidak's test	F (1, 732) = 3.449	P = 0.0637	F (23, 732) = 8.904	P < 0.0001	F (23, 732) = 0.5772	P = 0.9441	ZT	ZT0	ZT1	ZT2	ZT3	ZT4	ZT5	ZT6	ZT7	ZT8	ZT9	ZT10	ZT11	ZT12	ZT13	ZT14	ZT15	ZT16	ZT17	ZT18	ZT19	ZT20	ZT21	ZT22	ZT23
												0.9953	> 0.9999	> 0.9999	0.9966	> 0.9999	0.9928	> 0.9999	> 0.9999	> 0.9999	> 0.9999	0.9987	0.9978	> 0.9999	> 0.9999	> 0.9999	> 0.9999	> 0.9999	0.6107	> 0.9999	0.9904	> 0.9999	> 0.9999	0.9961	0.9973
	SD4-BL vs. SPS-BL, REMS Beta	n=20/group
	Light		Paired t-test,Two-tailed			0.0192
	Dark		Paired t-test,Two-tailed			0.3671
I	SD4-BL vs. SPS-BL, Wake Delta		Two-way ANOVA	Sidak's test	F (1, 912) = 0.02772	P = 0.8678	F (23, 912) = 13.20	P < 0.0001	F (23, 912) = 0.4569	P = 0.9872	ZT	ZT0	ZT1	ZT2	ZT3	ZT4	ZT5	ZT6	ZT7	ZT8	ZT9	ZT10	ZT11	ZT12	ZT13	ZT14	ZT15	ZT16	ZT17	ZT18	ZT19	ZT20	ZT21	ZT22	ZT23
												> 0.9999	> 0.9999	> 0.9999	> 0.9999	0.8073	0.9996	> 0.9999	> 0.9999	> 0.9999	> 0.9999	> 0.9999	> 0.9999	> 0.9999	> 0.9999	> 0.9999	> 0.9999	> 0.9999	> 0.9999	0.9984	> 0.9999	> 0.9999	> 0.9999	> 0.9999	> 0.9999
	SD4-BL vs. SPS-BL, Wake Delta	n=20/group
	Light		Paired t-test,Two-tailed			0.7168
	Dark		Paired t-test,Two-tailed			0.7696
J	SD4-BL vs. SPS-BL, Wake Theta		Two-way ANOVA	Sidak's test	F (1, 912) = 0.1781	P = 0.6731	F (23, 912) = 1.606	P = 0.0356	F (23, 912) = 0.4056	P = 0.9945	ZT	ZT0	ZT1	ZT2	ZT3	ZT4	ZT5	ZT6	ZT7	ZT8	ZT9	ZT10	ZT11	ZT12	ZT13	ZT14	ZT15	ZT16	ZT17	ZT18	ZT19	ZT20	ZT21	ZT22	ZT23
												> 0.9999	0.9995	> 0.9999	> 0.9999	> 0.9999	> 0.9999	0.9995	> 0.9999	0.9999	> 0.9999	> 0.9999	> 0.9999	> 0.9999	> 0.9999	> 0.9999	> 0.9999	> 0.9999	> 0.9999	> 0.9999	> 0.9999	> 0.9999	> 0.9999	> 0.9999	> 0.9999
	SD4-BL vs. SPS-BL, Wake Theta	n=20/group
	Light		Paired t-test,Two-tailed			0.872
	Dark		Paired t-test,Two-tailed			0.8057
K	SD4-BL vs. SPS-BL, Wake Alpha		Two-way ANOVA	Sidak's test	F (1, 912) = 0.08250	P = 0.7740	F (23, 912) = 18.73	P < 0.0001	F (23, 912) = 0.4813	P = 0.9818	ZT	ZT0	ZT1	ZT2	ZT3	ZT4	ZT5	ZT6	ZT7	ZT8	ZT9	ZT10	ZT11	ZT12	ZT13	ZT14	ZT15	ZT16	ZT17	ZT18	ZT19	ZT20	ZT21	ZT22	ZT23
												> 0.9999	> 0.9999	0.9978	> 0.9999	> 0.9999	> 0.9999	0.9764	> 0.9999	> 0.9999	> 0.9999	> 0.9999	> 0.9999	> 0.9999	> 0.9999	> 0.9999	> 0.9999	> 0.9999	> 0.9999	> 0.9999	> 0.9999	> 0.9999	> 0.9999	> 0.9999	> 0.9999
	SD4-BL vs. SPS-BL, Wake Alpha	n=20/group
	Light		Paired t-test,Two-tailed			0.8734
	Dark		Paired t-test,Two-tailed			0.9383
L	SD4-BL vs. SPS-BL, Wake Beta		Two-way ANOVA	Sidak's test	F (1, 912) = 3.057	P = 0.0807	F (23, 912) = 13.91	P < 0.0001	F (23, 912) = 0.5378	P = 0.9633	ZT	ZT0	ZT1	ZT2	ZT3	ZT4	ZT5	ZT6	ZT7	ZT8	ZT9	ZT10	ZT11	ZT12	ZT13	ZT14	ZT15	ZT16	ZT17	ZT18	ZT19	ZT20	ZT21	ZT22	ZT23
												0.9998	> 0.9999	0.9634	0.9998	> 0.9999	0.953	0.9997	0.9993	> 0.9999	> 0.9999	> 0.9999	> 0.9999	> 0.9999	> 0.9999	> 0.9999	> 0.9999	> 0.9999	> 0.9999	0.9988	> 0.9999	> 0.9999	> 0.9999	> 0.9999	> 0.9999
	SD4-BL vs. SPS-BL, Wake Beta	n=20/group
	Light		Paired t-test,Two-tailed			0.3644
	Dark		Paired t-test,Two-tailed			0.7358
Supplementary Figure 3
A	ZT4, NREMS Delta	n=20/group
	SD4-BL vs. SD4-D1		Unpaired t-test,Two-tailed			< 0.0001
	SPS-BL vs. SPS-D1		Unpaired t-test,Two-tailed			0.0254
	ZT4, NREMS Theta	n=20/group
	SD4-BL vs. SD4-D1		Unpaired t-test,Two-tailed			< 0.0001
	SPS-BL vs. SPS-D1		Unpaired t-test,Two-tailed			0.0023
	ZT4, NREMS Alpha	n=20/group
	SD4-BL vs. SD4-D1		Unpaired t-test,Two-tailed			< 0.0001
	SPS-BL vs. SPS-D1		Unpaired t-test,Two-tailed			0.162
	ZT4, NREMS Beta	n=20/group
	SD4-BL vs. SD4-D1		Unpaired t-test,Two-tailed			< 0.0001
	SPS-BL vs. SPS-D1		Unpaired t-test,Two-tailed			0.9902
B	SD4-BL vs. SD4-D1, NREMS Delta	n=20/group
	Light		Paired t-test,Two-tailed			< 0.0001
	Dark		Paired t-test,Two-tailed			0.026
	SD4-BL vs. SD4-D1, NREMS Theta	n=20/group
	Light		Paired t-test,Two-tailed			0.003
	Dark		Paired t-test,Two-tailed			0.5286
	SD4-BL vs. SD4-D1, NREMS Alpha	n=20/group
	Light		Paired t-test,Two-tailed			0.0117
	Dark		Paired t-test,Two-tailed			0.0001
	SD4-BL vs. SD4-D1, NREMS Beta	n=20/group
	Light		Paired t-test,Two-tailed			0.0171
	Dark		Paired t-test,Two-tailed			< 0.0001
C	SD4-BL vs. SD4-D1, REMS Delta	n=20/group
	Light		Paired t-test,Two-tailed			0.1208
	Dark		Paired t-test,Two-tailed			0.0918
	SD4-BL vs. SD4-D1, REMS Theta	n=20/group
	Light		Paired t-test,Two-tailed			0.2271
	Dark		Paired t-test,Two-tailed			0.2313
	SD4-BL vs. SD4-D1, REMS Alpha	n=20/group
	Light		Paired t-test,Two-tailed			0.0528
	Dark		Paired t-test,Two-tailed			0.5213
	SD4-BL vs. SD4-D1, REMS Beta	n=20/group
	Light		Paired t-test,Two-tailed			0.5915
	Dark		Paired t-test,Two-tailed			0.0165
D	SD4-BL vs. SD4-D1, Wake Delta	n=20/group
	Light		Paired t-test,Two-tailed			0.0653
	Dark		Paired t-test,Two-tailed			0.4403
	SD4-BL vs. SD4-D1, Wake Theta	n=20/group
	Light		Paired t-test,Two-tailed			0.0061
	Dark		Paired t-test,Two-tailed			0.0056
	SD4-BL vs. SD4-D1, Wake Alpha	n=20/group
	Light		Paired t-test,Two-tailed			0.0988
	Dark		Paired t-test,Two-tailed			0.4172
	SD4-BL vs. SD4-D1, Wake Beta	n=20/group
	Light		Paired t-test,Two-tailed			0.4198
	Dark		Paired t-test,Two-tailed			0.5177
Supplementary Figure 4
A	SD4-D7 vs. SPS-D7, NREMS	n=19/group	Two-way RM ANOVA	Sidak's test	F (1, 408) = 1.469	P = 0.2262	F (23, 408) = 34.51	P < 0.0001	F (23, 408) = 1.899	P = 0.0078	ZT	ZT0	ZT1	ZT2	ZT3	ZT4	ZT5	ZT6	ZT7	ZT8	ZT9	ZT10	ZT11	ZT12	ZT13	ZT14	ZT15	ZT16	ZT17	ZT18	ZT19	ZT20	ZT21	ZT22	ZT23
												> 0.9999	> 0.9999	> 0.9999	0.8069	0.9929	> 0.9999	0.5624	> 0.9999	> 0.9999	0.9996	> 0.9999	> 0.9999	> 0.9999	0.8576	0.9995	> 0.9999	0.0712	0.0392	0.9257	0.9874	> 0.9999	> 0.9999	> 0.9999	0.7788
	SD4-D7 vs. SPS-D7, REMS	n=19/group	Two-way RM ANOVA	Sidak's test	F (1, 408) = 0.7526	P = 0.3862	F (23, 408) = 46.16	P < 0.0001	F (23, 408) = 1.889	P = 0.0083	ZT	ZT0	ZT1	ZT2	ZT3	ZT4	ZT5	ZT6	ZT7	ZT8	ZT9	ZT10	ZT11	ZT12	ZT13	ZT14	ZT15	ZT16	ZT17	ZT18	ZT19	ZT20	ZT21	ZT22	ZT23
												> 0.9999	0.8702	0.9651	> 0.9999	0.0318	0.7799	0.9057	0.4635	> 0.9999	0.5216	> 0.9999	> 0.9999	> 0.9999	0.999	> 0.9999	> 0.9999	> 0.9999	0.9952	> 0.9999	0.5512	> 0.9999	> 0.9999	> 0.9999	> 0.9999
	SD4-D7 vs. SPS-D7, Wake	n=19/group	Two-way RM ANOVA	Sidak's test	F (1, 408) = 1.099	P = 0.2951	F (23, 408) = 41.72	P < 0.0001	F (23, 408) = 1.940	P = 0.0062	ZT	ZT0	ZT1	ZT2	ZT3	ZT4	ZT5	ZT6	ZT7	ZT8	ZT9	ZT10	ZT11	ZT12	ZT13	ZT14	ZT15	ZT16	ZT17	ZT18	ZT19	ZT20	ZT21	ZT22	ZT23
												> 0.9999	> 0.9999	> 0.9999	0.8915	0.8142	> 0.9999	0.4817	> 0.9999	> 0.9999	0.9951	> 0.9999	> 0.9999	> 0.9999	0.7851	0.9998	> 0.9999	0.1177	0.0547	0.9889	0.9776	> 0.9999	> 0.9999	0.9989	0.8413
B	SD4-D7 vs. SPS-D7, NREMS	n=19/group
	ZT0-23		Paired t-test,Two-tailed			0.1576
	Light		Paired t-test,Two-tailed			0.8313
	Dark		Paired t-test,Two-tailed			0.14
	SD4-D7 vs. SPS-D7, REMS	n=19/group
	ZT0-23		Paired t-test,Two-tailed			0.4389
	Light		Paired t-test,Two-tailed			0.5266
	Dark		Paired t-test,Two-tailed			0.517
	SD4-D7 vs. SPS-D7, Wake	n=19/group
	ZT0-23		Paired t-test,Two-tailed			0.2508
	Light		Paired t-test,Two-tailed			0.998
	Dark		Paired t-test,Two-tailed			0.1729
C	SD4-D7 vs. SPS-D7, NREMS bout length	n=19/group	Two-way RM ANOVA	Sidak's test	F (1, 408) = 4.308	P = 0.0386	F (23, 408) = 2.109	P = 0.0022	F (23, 408) = 1.143	P = 0.2948	ZT	ZT0	ZT1	ZT2	ZT3	ZT4	ZT5	ZT6	ZT7	ZT8	ZT9	ZT10	ZT11	ZT12	ZT13	ZT14	ZT15	ZT16	ZT17	ZT18	ZT19	ZT20	ZT21	ZT22	ZT23
												0.9665	> 0.9999	> 0.9999	0.9949	0.979	0.7217	> 0.9999	> 0.9999	> 0.9999	0.9745	> 0.9999	> 0.9999	> 0.9999	> 0.9999	0.984	0.8802	> 0.9999	> 0.9999	> 0.9999	0.8007	> 0.9999	0.9818	> 0.9999	0.7984
	SD4-D7 vs. SPS-D7, REMS bout length	n=19/group	Two-way RM ANOVA	Sidak's test	F (1, 408) = 2.560	P = 0.1104	F (23, 408) = 14.23	P < 0.0001	F (23, 408) = 1.850	P = 0.0103	ZT	ZT0	ZT1	ZT2	ZT3	ZT4	ZT5	ZT6	ZT7	ZT8	ZT9	ZT10	ZT11	ZT12	ZT13	ZT14	ZT15	ZT16	ZT17	ZT18	ZT19	ZT20	ZT21	ZT22	ZT23
												> 0.9999	0.9956	0.9925	0.7705	0.9746	0.001	0.9998	> 0.9999	> 0.9999	0.9997	> 0.9999	0.821	> 0.9999	0.9327	> 0.9999	> 0.9999	> 0.9999	> 0.9999	> 0.9999	0.8215	> 0.9999	> 0.9999	0.9425	> 0.9999
	SD4-D7 vs. SPS-D7, Wake bout length	n=19/group	Two-way RM ANOVA	Sidak's test	F (1, 408) = 1.467	P = 0.2265	F (23, 408) = 11.20	P < 0.0001	F (23, 408) = 1.076	P = 0.3697	ZT	ZT0	ZT1	ZT2	ZT3	ZT4	ZT5	ZT6	ZT7	ZT8	ZT9	ZT10	ZT11	ZT12	ZT13	ZT14	ZT15	ZT16	ZT17	ZT18	ZT19	ZT20	ZT21	ZT22	ZT23
												> 0.9999	> 0.9999	> 0.9999	0.9975	> 0.9999	> 0.9999	> 0.9999	> 0.9999	> 0.9999	> 0.9999	> 0.9999	> 0.9999	0.992	0.9976	> 0.9999	0.9969	0.9664	0.4344	> 0.9999	0.9979	> 0.9999	> 0.9999	0.9918	0.2274
D	SD4-D7 vs. SPS-D7, NREMS bout No.	n=19/group	Two-way RM ANOVA	Sidak's test	F (1, 408) = 2.571	P = 0.1096	F (23, 408) = 15.26	P < 0.0001	F (23, 408) = 1.115	P = 0.3248	ZT	ZT0	ZT1	ZT2	ZT3	ZT4	ZT5	ZT6	ZT7	ZT8	ZT9	ZT10	ZT11	ZT12	ZT13	ZT14	ZT15	ZT16	ZT17	ZT18	ZT19	ZT20	ZT21	ZT22	ZT23
												> 0.9999	> 0.9999	> 0.9999	> 0.9999	0.9495	0.7742	0.9997	0.6688	> 0.9999	> 0.9999	> 0.9999	> 0.9999	> 0.9999	> 0.9999	0.9965	> 0.9999	0.7231	0.4446	> 0.9999	> 0.9999	> 0.9999	> 0.9999	> 0.9999	0.9668
	SD4-D7 vs. SPS-D7, REMS bout No.	n=19/group	Two-way RM ANOVA	Sidak's test	F (1, 408) = 0.0004638	P = 0.9828	F (23, 408) = 32.92	P < 0.0001	F (23, 408) = 1.067	P = 0.3798	ZT	ZT0	ZT1	ZT2	ZT3	ZT4	ZT5	ZT6	ZT7	ZT8	ZT9	ZT10	ZT11	ZT12	ZT13	ZT14	ZT15	ZT16	ZT17	ZT18	ZT19	ZT20	ZT21	ZT22	ZT23
												> 0.9999	> 0.9999	> 0.9999	0.9989	> 0.9999	0.5797	0.9989	0.9997	> 0.9999	0.9989	0.8405	> 0.9999	> 0.9999	> 0.9999	> 0.9999	> 0.9999	0.9997	0.6744	> 0.9999	0.9889	> 0.9999	> 0.9999	> 0.9999	> 0.9999
	SD4-D7 vs. SPS-D7, Wake bout No.	n=19/group	Two-way RM ANOVA	Sidak's test	F (1, 408) = 3.246	P = 0.0723	F (23, 408) = 12.55	P < 0.0001	F (23, 408) = 0.9878	P = 0.4799	ZT	ZT0	ZT1	ZT2	ZT3	ZT4	ZT5	ZT6	ZT7	ZT8	ZT9	ZT10	ZT11	ZT12	ZT13	ZT14	ZT15	ZT16	ZT17	ZT18	ZT19	ZT20	ZT21	ZT22	ZT23
												> 0.9999	> 0.9999	> 0.9999	> 0.9999	0.5791	0.5214	> 0.9999	0.9138	> 0.9999	> 0.9999	0.9996	> 0.9999	> 0.9999	> 0.9999	> 0.9999	> 0.9999	0.7474	0.9601	> 0.9999	> 0.9999	> 0.9999	> 0.9999	> 0.9999	0.9138
E	behavior	n=9/group
	TST	n=17(SD4)&12(SPS)	Unpaired t-test,Two-tailed			0.0938
	FST	n=17(SD4)&12(SPS)	Unpaired t-test,Two-tailed			0.0008
Supplementary Figure 5
A	mCherry	n=9/group
	SD4-D1 vs. SPS-D1, NREMS		Two-way RM ANOVA	Sidak's test	F (1, 160) = 55.30	P < 0.0001	F (19, 160) = 16.53	P < 0.0001	F (19, 160) = 5.131	P < 0.0001	ZT	ZT0	ZT1	ZT2	ZT3	ZT4	ZT5	ZT6	ZT7	ZT8	ZT9	ZT10	ZT11	ZT12	ZT13	ZT14	ZT15	ZT16	ZT17	ZT18	ZT19	ZT20	ZT21	ZT22	ZT23
																0.0442	> 0.9999	0.9893	> 0.9999	> 0.9999	> 0.9999	0.9941	0.9483	0.9982	0.005	0.0131	0.0174	< 0.0001	0.0003	0.4818	> 0.9999	0.0001	0.1037	0.0003	> 0.9999
	SD4-D1 vs. SPS-D1, REMS		Two-way RM ANOVA	Sidak's test	F (1, 160) = 7.186	P = 0.0081	F (19, 160) = 11.29	P < 0.0001	F (19, 160) = 12.00	P < 0.0001	ZT	ZT0	ZT1	ZT2	ZT3	ZT4	ZT5	ZT6	ZT7	ZT8	ZT9	ZT10	ZT11	ZT12	ZT13	ZT14	ZT15	ZT16	ZT17	ZT18	ZT19	ZT20	ZT21	ZT22	ZT23
																< 0.0001	< 0.0001	< 0.0001	> 0.9999	0.2824	0.1653	> 0.9999	0.1473	> 0.9999	0.1159	0.0172	0.0172	0.1025	0.0408	0.9845	> 0.9999	< 0.0001	0.6341	0.0009	> 0.9999
	SD4-D1 vs. SPS-D1, Wake		Two-way RM ANOVA	Sidak's test	F (1, 160) = 49.92	P < 0.0001	F (19, 160) = 17.01	P < 0.0001	F (19, 160) = 6.495	P < 0.0001	ZT	ZT0	ZT1	ZT2	ZT3	ZT4	ZT5	ZT6	ZT7	ZT8	ZT9	ZT10	ZT11	ZT12	ZT13	ZT14	ZT15	ZT16	ZT17	ZT18	ZT19	ZT20	ZT21	ZT22	ZT23
B	mCherry	n=9/group														0.004	0.7871	> 0.9999	> 0.9999	> 0.9999	> 0.9999	0.9969	0.8108	0.9998	0.0038	0.0045	0.008	< 0.0001	0.0002	0.4966	> 0.9999	< 0.0001	0.088	< 0.0001	> 0.9999
	SD4-D1 vs. SPS-D1, NREMS
	ZT4-23		Paired t-test,Two-tailed			< 0.0001
	Light		Paired t-test,Two-tailed			0.4485
	Dark		Paired t-test,Two-tailed			< 0.0001
	SD4-D1 vs. SPS-D1, REMS
	ZT4-23		Paired t-test,Two-tailed			0.0403
	Light		Paired t-test,Two-tailed			< 0.0001
	Dark		Paired t-test,Two-tailed			0.0006
	SD4-D1 vs. SPS-D1, Wake
	ZT4-23		Paired t-test,Two-tailed			< 0.0001
	Light		Paired t-test,Two-tailed			0.0862
	Dark		Paired t-test,Two-tailed			< 0.0001
C	hM4Di	n=9/group
	SD4-D1 vs. SPS-D1, NREMS		Two-way RM ANOVA	Sidak's test	F (1, 160) = 31.03	P < 0.0001	F (19, 160) = 14.01	P < 0.0001	F (19, 160) = 3.636	P < 0.0001	ZT	ZT0	ZT1	ZT2	ZT3	ZT4	ZT5	ZT6	ZT7	ZT8	ZT9	ZT10	ZT11	ZT12	ZT13	ZT14	ZT15	ZT16	ZT17	ZT18	ZT19	ZT20	ZT21	ZT22	ZT23
																0.0463	> 0.9999	0.8171	> 0.9999	0.9994	> 0.9999	> 0.9999	> 0.9999	0.8993	0.8057	0.5416	> 0.9999	0.0418	0.0002	0.5773	0.0045	0.7043	0.0151	> 0.9999	0.0475
	SD4-D1 vs. SPS-D1, REMS		Two-way RM ANOVA	Sidak's test	F (1, 160) = 2.159	P = 0.1437	F (19, 160) = 9.930	P < 0.0001	F (19, 160) = 8.846	P < 0.0001	ZT	ZT0	ZT1	ZT2	ZT3	ZT4	ZT5	ZT6	ZT7	ZT8	ZT9	ZT10	ZT11	ZT12	ZT13	ZT14	ZT15	ZT16	ZT17	ZT18	ZT19	ZT20	ZT21	ZT22	ZT23
																< 0.0001	< 0.0001	0.0344	0.2155	> 0.9999	> 0.9999	> 0.9999	> 0.9999	0.9985	0.9976	0.8795	0.9834	0.0914	< 0.0001	0.9944	0.0135	0.128	0.002	> 0.9999	> 0.9999
	SD4-D1 vs. SPS-D1, Wake		Two-way RM ANOVA	Sidak's test	F (1, 160) = 27.53	P < 0.0001	F (19, 160) = 14.13	P < 0.0001	F (19, 160) = 4.577	P < 0.0001	ZT	ZT0	ZT1	ZT2	ZT3	ZT4	ZT5	ZT6	ZT7	ZT8	ZT9	ZT10	ZT11	ZT12	ZT13	ZT14	ZT15	ZT16	ZT17	ZT18	ZT19	ZT20	ZT21	ZT22	ZT23
																0.0024	> 0.9999	0.9997	> 0.9999	0.9989	> 0.9999	> 0.9999	> 0.9999	0.9345	0.8563	0.6457	0.9991	0.028	< 0.0001	0.475	0.0012	0.293	0.0044	> 0.9999	0.0976
D	hM4Di	n=9/group
	SD4-D1 vs. SPS-D1, NREMS
	ZT4-23		Paired t-test,Two-tailed			0.0007
	Light		Paired t-test,Two-tailed			0.942
	Dark		Paired t-test,Two-tailed			0.0005
	SD4-D1 vs. SPS-D1, REMS
	ZT4-23		Paired t-test,Two-tailed			0.2287
	Light		Paired t-test,Two-tailed			0.0018
	Dark		Paired t-test,Two-tailed			< 0.0001
	SD4-D1 vs. SPS-D1, Wake
	ZT4-23		Paired t-test,Two-tailed			0.0006
	Light		Paired t-test,Two-tailed			0.0333
	Dark		Paired t-test,Two-tailed			0.0003
E	mCherry vs. hM4Di, ‘SPS-D1’-‘SD4-D1’	n=9/group
	NREMS
	ZT4-23		Unpaired t-test,Two-tailed			0.4703
	Light		Unpaired t-test,Two-tailed			0.4944
	Dark		Unpaired t-test,Two-tailed			0.2942
	REMS
	ZT4-23		Unpaired t-test,Two-tailed			0.5244
	Light		Unpaired t-test,Two-tailed			0.5998
	Dark		Unpaired t-test,Two-tailed			0.673
	Wake
	ZT4-23		Unpaired t-test,Two-tailed			0.4255
	Light		Unpaired t-test,Two-tailed			0.5355
	Dark		Unpaired t-test,Two-tailed			0.2843
Supplementary Figure 6
A	mCherry	n=9/group
	SD4-D1 vs. SPS-D1, NREMS Delta
	Light		Paired t-test,Two-tailed			0.0626
	Dark		Paired t-test,Two-tailed			0.0015
	SD4-D1 vs. SPS-D1, NREMS Theta
	Light		Paired t-test,Two-tailed			0.8468
	Dark		Paired t-test,Two-tailed			0.001
	SD4-D1 vs. SPS-D1, NREMS Alpha
	Light		Paired t-test,Two-tailed			0.2452
	Dark		Paired t-test,Two-tailed			0.0442
	SD4-D1 vs. SPS-D1, NREMS Beta
	Light		Paired t-test,Two-tailed			0.859
	Dark		Paired t-test,Two-tailed			0.0122
	hM4Di	n=9/group
	SD4-D1 vs. SPS-D1, NREMS Delta
	Light		Paired t-test,Two-tailed			0.4548
	Dark		Paired t-test,Two-tailed			0.1511
	SD4-D1 vs. SPS-D1, NREMS Theta
	Light		Paired t-test,Two-tailed			0.3766
	Dark		Paired t-test,Two-tailed			0.0215
	SD4-D1 vs. SPS-D1, NREMS Alpha
	Light		Paired t-test,Two-tailed			0.1206
	Dark		Paired t-test,Two-tailed			0.0321
	SD4-D1 vs. SPS-D1, NREMS Beta
	Light		Paired t-test,Two-tailed			0.8533
	Dark		Paired t-test,Two-tailed			0.0192
B	mCherry	n=9/group
	SD4-D1 vs. SPS-D1, REMS Delta
	Light		Paired t-test,Two-tailed			0.5885
	Dark		Paired t-test,Two-tailed			0.2178
	SD4-D1 vs. SPS-D1, REMS Theta
	Light		Paired t-test,Two-tailed			0.9685
	Dark		Paired t-test,Two-tailed			0.2127
	SD4-D1 vs. SPS-D1, REMS Alpha
	Light		Paired t-test,Two-tailed			0.0006
	Dark		Paired t-test,Two-tailed			0.8574
	SD4-D1 vs. SPS-D1, REMS Beta
	Light		Paired t-test,Two-tailed			0.0003
	Dark		Paired t-test,Two-tailed			0.2525
	hM4Di	n=9/group
	SD4-D1 vs. SPS-D1, REMS Delta
	Light		Paired t-test,Two-tailed			0.0476
	Dark		Paired t-test,Two-tailed			0.925
	SD4-D1 vs. SPS-D1, REMS Theta
	Light		Paired t-test,Two-tailed			0.6022
	Dark		Paired t-test,Two-tailed			0.0068
	SD4-D1 vs. SPS-D1, REMS Alpha
	Light		Paired t-test,Two-tailed			0.0533
	Dark		Paired t-test,Two-tailed			0.0909
	SD4-D1 vs. SPS-D1, REMS Beta
	Light		Paired t-test,Two-tailed			0.2777
	Dark		Paired t-test,Two-tailed			0.5424
C	mCherry vs. hM4Di, (‘SPS-D1’-‘SD4-D1’)/ ‘SD4-D1’ power change (%),	n=9/group
	REMS Delta
	Light		Unpaired t-test,Two-tailed			0.057
	Dark		Unpaired t-test,Two-tailed			0.3112
	REMS Theta
	Light		Unpaired t-test,Two-tailed			0.5429
	Dark		Unpaired t-test,Two-tailed			0.32
	REMS Alpha
	Light		Unpaired t-test,Two-tailed			0.4076
	Dark		Unpaired t-test,Two-tailed			0.5293
	REMS Beta
	Light		Unpaired t-test,Two-tailed			0.1544
	Dark		Unpaired t-test,Two-tailed			0.5918
D	mCherry
	SD4-D1 vs. SPS-D1, Wake Delta
	Light		Paired t-test,Two-tailed			0.0149
	Dark		Paired t-test,Two-tailed			0.0691
	SD4-D1 vs. SPS-D1, Wake Theta
	Light		Paired t-test,Two-tailed			0.5356
	Dark		Paired t-test,Two-tailed			0.0505
	SD4-D1 vs. SPS-D1, Wake Alpha
	Light		Paired t-test,Two-tailed			0.1526
	Dark		Paired t-test,Two-tailed			0.0003
	SD4-D1 vs. SPS-D1, Wake Beta
	Light		Paired t-test,Two-tailed			0.2209
	Dark		Paired t-test,Two-tailed			0.0022
	hM4Di	n=9/group
	SD4-D1 vs. SPS-D1, Wake Delta
	Light		Paired t-test,Two-tailed			0.4567
	Dark		Paired t-test,Two-tailed			0.0946
	SD4-D1 vs. SPS-D1, Wake Theta
	Light		Paired t-test,Two-tailed			0.4491
	Dark		Paired t-test,Two-tailed			0.0357
	SD4-D1 vs. SPS-D1, Wake Alpha
	Light		Paired t-test,Two-tailed			0.326
	Dark		Paired t-test,Two-tailed			0.005
	SD4-D1 vs. SPS-D1, Wake Beta
	Light		Paired t-test,Two-tailed			0.3258
	Dark		Paired t-test,Two-tailed			0.0052
E	mCherry vs. hM4Di, (‘SPS-D1’-‘SD4-D1’)/ ‘SD4-D1’ power change (%)	n=9/group
	Wake Delta
	Light		Unpaired t-test,Two-tailed			0.065
	Dark		Unpaired t-test,Two-tailed			0.9776
	Wake Theta
	Light		Unpaired t-test,Two-tailed			0.3345
	Dark		Unpaired t-test,Two-tailed			0.7684
	Wake Alpha
	Light		Unpaired t-test,Two-tailed			0.9053
	Dark		Unpaired t-test,Two-tailed			0.7411
	Wake Beta
	Light		Unpaired t-test,Two-tailed			0.9177
	Dark		Unpaired t-test,Two-tailed			0.3933
Supplementary Figure 7
A	mCherry	n=9/group
	SD4-D7 vs. SPS-D7, NREMS Delta
	Light		Paired t-test,Two-tailed			0.0024
	Dark		Paired t-test,Two-tailed			0.0002
	SD4-D7 vs. SPS-D7, NREMS Theta
	Light		Paired t-test,Two-tailed			0.021
	Dark		Paired t-test,Two-tailed			0.0229
	SD4-D7 vs. SPS-D7, NREMS Alpha
	Light		Paired t-test,Two-tailed			0.012
	Dark		Paired t-test,Two-tailed			0.0061
	SD4-D7 vs. SPS-D7, NREMS Beta
	Light		Paired t-test,Two-tailed			0.0031
	Dark		Paired t-test,Two-tailed			0.0069
	hM4Di	n=9/group
	SD4-D7 vs. SPS-D7, NREMS Delta
	Light		Paired t-test,Two-tailed			0.5786
	Dark		Paired t-test,Two-tailed			0.005
	SD4-D7 vs. SPS-D7, NREMS Theta
	Light		Paired t-test,Two-tailed			0.6553
	Dark		Paired t-test,Two-tailed			0.7649
	SD4-D7 vs. SPS-D7, NREMS Alpha
	Light		Paired t-test,Two-tailed			0.479
	Dark		Paired t-test,Two-tailed			0.744
	SD4-D7 vs. SPS-D7, NREMS Beta
	Light		Paired t-test,Two-tailed			0.5052
	Dark		Paired t-test,Two-tailed			0.7339
B	mCherry	n=9/group
	SD4-D7 vs. SPS-D7, REMS Delta
	Light		Paired t-test,Two-tailed			0.0155
	Dark		Paired t-test,Two-tailed			0.1038
	SD4-D7 vs. SPS-D7, REMS Theta
	Light		Paired t-test,Two-tailed			0.3758
	Dark		Paired t-test,Two-tailed			0.2862
	SD4-D7 vs. SPS-D7, REMS Alpha
	Light		Paired t-test,Two-tailed			0.0046
	Dark		Paired t-test,Two-tailed			0.1591
	SD4-D7 vs. SPS-D7, REMS Beta
	Light		Paired t-test,Two-tailed			0.0508
	Dark		Paired t-test,Two-tailed			0.4615
	hM4Di	n=9/group
	SD4-D7 vs. SPS-D7, REMS Delta
	Light		Paired t-test,Two-tailed			0.0242
	Dark		Paired t-test,Two-tailed			0.9556
	SD4-D7 vs. SPS-D7, REMS Theta
	Light		Paired t-test,Two-tailed			0.2929
	Dark		Paired t-test,Two-tailed			0.8214
	SD4-D7 vs. SPS-D7, REMS Alpha
	Light		Paired t-test,Two-tailed			0.4022
	Dark		Paired t-test,Two-tailed			0.2897
	SD4-D7 vs. SPS-D7, REMS Beta
	Light		Paired t-test,Two-tailed			0.3613
	Dark		Paired t-test,Two-tailed			0.3684
C	mCherry vs. hM4Di, (‘SPS-D7’-‘SD4-D7’)/ ‘SD4-D7’ power change (%)	n=9/group
	REMS Delta
	Light		Unpaired t-test,Two-tailed			0.8511
	Dark		Unpaired t-test,Two-tailed			0.3028
	REMS Theta
	Light		Unpaired t-test,Two-tailed			0.946
	Dark		Unpaired t-test,Two-tailed			0.3339
	REMS Alpha
	Light		Unpaired t-test,Two-tailed			0.0107
	Dark		Unpaired t-test,Two-tailed			0.0963
	REMS Beta
	Light		Unpaired t-test,Two-tailed			0.0356
	Dark		Unpaired t-test,Two-tailed			0.1974
D	mCherry	n=9/group
	SD4-D7 vs. SPS-D7, Wake Delta
	Light		Paired t-test,Two-tailed			0.0306
	Dark		Paired t-test,Two-tailed			0.2565
	SD4-D7 vs. SPS-D7, Wake Theta
	Light		Paired t-test,Two-tailed			0.1306
	Dark		Paired t-test,Two-tailed			0.389
	SD4-D7 vs. SPS-D7, Wake Alpha
	Light		Paired t-test,Two-tailed			0.013
	Dark		Paired t-test,Two-tailed			0.0076
	SD4-D7 vs. SPS-D7, Wake Beta
	Light		Paired t-test,Two-tailed			0.0066
	Dark		Paired t-test,Two-tailed			0.041
	hM4Di	n=9/group
	SD4-D7 vs. SPS-D7, Wake Delta
	Light		Paired t-test,Two-tailed			0.9203
	Dark		Paired t-test,Two-tailed			0.8598
	SD4-D7 vs. SPS-D7, Wake Theta
	Light		Paired t-test,Two-tailed			0.5783
	Dark		Paired t-test,Two-tailed			0.9757
	SD4-D7 vs. SPS-D7, Wake Alpha
	Light		Paired t-test,Two-tailed			0.4577
	Dark		Paired t-test,Two-tailed			0.1008
	SD4-D7 vs. SPS-D7, Wake Beta
	Light		Paired t-test,Two-tailed			0.2349
	Dark		Paired t-test,Two-tailed			0.3308
E	mCherry vs. hM4Di, (‘SPS-D7’-‘SD4-D7’)/ ‘SD4-D7’ power change (%),	n=9/group
	Wake Delta
	Light		Unpaired t-test,Two-tailed			0.0461
	Dark		Unpaired t-test,Two-tailed			0.3466
	Wake Theta
	Light		Unpaired t-test,Two-tailed			0.1029
	Dark		Unpaired t-test,Two-tailed			0.4281
	Wake Alpha
	Light		Unpaired t-test,Two-tailed			0.0323
	Dark		Unpaired t-test,Two-tailed			0.092
	Wake Beta
	Light		Unpaired t-test,Two-tailed			0.027
	Dark		Unpaired t-test,Two-tailed			0.3114
